# Supplementary material for: Describing differences in weight and length growth trajectories between white and Pakistani infants in the UK: analysis of the Born in Bradford birth cohort study using multilevel linear spline models
Source: PubMed Central journal article supplement — Arch Dis Child. 2013 Feb 16;98(4):274–9. doi: 10.1136/archdischild-2012-302778 (PMC3858016; doi:10.1136/archdischild-2012-302778), 2013-02-16
Supplement: archdischild-2012-302778-s1.pdf [file archdischild-2012-302778-s1.pdf]

**Describing differences in weight and length growth trajectories between White and Pakistani Infants in the UK: Analysis of the Born in Bradford birth cohort study using multilevel linear spline models**

**Supplementary Web tables**

**Table S1:** Summary of measurements included in the growth models for 1434 White British and Pakistani infants

|                | <b>Number of children with at least one measurement per growth period</b> | <b>Total number of measurements</b> | <b>% from health visitor records</b> | <b>Median (IQR) number of measurements per child</b> |
|----------------|---------------------------------------------------------------------------|-------------------------------------|--------------------------------------|------------------------------------------------------|
| <b>Weight</b>  |                                                                           |                                     |                                      |                                                      |
| <b>Overall</b> | 1434                                                                      | 11432                               | 55.8%                                | 7 (6 to 9)                                           |
| 0-4 months     | 1265                                                                      | 3560                                | 100.0%                               | 2 (2 to 3)                                           |
| 4-9 months     | 1240                                                                      | 2581                                | 58.1%                                | 2 (1 to 2)                                           |
| 9-24 months    | 1316                                                                      | 3857                                | 34.2%                                | 3 (2 to 4)                                           |
| <b>Length*</b> |                                                                           |                                     |                                      |                                                      |
| <b>Overall</b> | 1372                                                                      | 5414                                | 35.7%                                | 4 (3 to 5)                                           |
| 0-4 months     | 725                                                                       | 860                                 | 100.0%                               | 1 (1 to 1)                                           |
| 4-9 months     | 1125                                                                      | 1343                                | 20.1%                                | 1 (1 to 1)                                           |
| 9-24 months    | 1289                                                                      | 3211                                | 25.1%                                | 2 (2 to 3)                                           |

\* Note: Length not routinely recorded at birth  
IQR, interquartile range

**Table S2:** Comparing actual measurements with measurements predicted by the models for weight and length overall and for each ethnicity and sex group (unadjusted model)

| Time period      | Group               | No. Measurements | Mean actual measurement (SD) | Mean difference (actual – predicted) | 95% level of agreement | Residual SD* |
|------------------|---------------------|------------------|------------------------------|--------------------------------------|------------------------|--------------|
| <b>Weight</b>    |                     |                  |                              |                                      |                        |              |
| Birth (kg)       | All                 | 1434             | 3.22 (0.55)                  | 0.023                                | -0.25 to 0.30          | 0.13         |
|                  | White British boys  | 314              | 3.38 (0.59)                  | 0.009                                | -0.30 to 0.32          | 0.13         |
|                  | Pakistani boys      | 383              | 3.19 (0.52)                  | 0.024                                | -0.23 to 0.28          | 0.12         |
|                  | White British girls | 328              | 3.26 (0.56)                  | 0.030                                | -0.25 to 0.31          | 0.13         |
|                  | Pakistani girls     | 409              | 3.08 (0.51)                  | 0.026                                | -0.22 to 0.27          | 0.13         |
| 0-4 months (kg)  | All                 | 3560             | 4.50 (1.12)                  | -0.002                               | -0.30 to 0.30          | 0.17         |
|                  | White British boys  | 906              | 4.81 (1.22)                  | 0.006                                | -0.31 to 0.32          | 0.16         |
|                  | Pakistani boys      | 830              | 4.48 (1.12)                  | 0.0003                               | -0.30 to 0.30          | 0.16         |
|                  | White British girls | 927              | 4.51 (1.07)                  | -0.007                               | -0.33 to 0.32          | 0.19         |
|                  | Pakistani girls     | 897              | 4.18 (0.98)                  | -0.007                               | -0.25 to 0.24          | 0.16         |
| 4-9 months (kg)  | All                 | 2581             | 7.83 (1.19)                  | -0.012                               | -0.34 to 0.31          | 0.12         |
|                  | White British boys  | 658              | 8.19 (1.18)                  | -0.021                               | -0.34 to 0.30          | 0.11         |
|                  | Pakistani boys      | 619              | 8.12 (1.20)                  | -0.019                               | -0.36 to 0.32          | 0.13         |
|                  | White British girls | 686              | 7.55 (1.13)                  | -0.002                               | -0.31 to 0.31          | 0.12         |
|                  | Pakistani girls     | 618              | 7.46 (1.06)                  | -0.005                               | -0.34 to 0.33          | 0.13         |
| 9-24 months (kg) | All                 | 3857             | 10.67 (1.83)                 | 0.001                                | -0.55 to 0.55          | 0.09         |
|                  | White British boys  | 780              | 11.08 (1.67)                 | 0.003                                | -0.54 to 0.55          | 0.09         |
|                  | Pakistani boys      | 1046             | 10.87 (1.91)                 | 0.001                                | -0.59 to 0.59          | 0.10         |
|                  | White British girls | 880              | 10.39 (1.72)                 | -0.001                               | -0.52 to 0.52          | 0.09         |
|                  | Pakistani girls     | 1151             | 10.44 (1.88)                 | -0.0003                              | -0.52 to 0.52          | 0.09         |
| <b>Length</b>    |                     |                  |                              |                                      |                        |              |
| 0-4 months (cm)  | All                 | 860              | 51.30 (3.44)                 | -0.050                               | -2.54 to 2.44          | 1.27         |
|                  | White British boys  | 150              | 52.15 (4.18)                 | -0.067                               | -2.92 to 2.79          | 1.45         |
|                  | Pakistani boys      | 214              | 51.37 (3.34)                 | -0.075                               | -2.70 to 2.55          | 1.25         |
|                  | White British girls | 220              | 51.16 (3.31)                 | -0.020                               | -2.68 to 2.64          | 1.44         |
|                  | Pakistani girls     | 276              | 50.88 (3.09)                 | -0.044                               | -2.06 to 1.97          | 1.01         |
| 4-9 months (cm)  | All                 | 1343             | 69.24 (3.19)                 | 0.053                                | -2.42 to 2.53          | 1.16         |
|                  | White British boys  | 290              | 69.62 (3.08)                 | 0.041                                | -2.33 to 2.41          | 1.12         |
|                  | Pakistani boys      | 368              | 70.52 (3.08)                 | 0.059                                | -2.60 to 2.71          | 1.18         |
|                  | White British girls | 315              | 67.61 (3.12)                 | 0.043                                | -2.43 to 2.52          | 1.25         |
|                  | Pakistani girls     | 370              | 69.07 (2.78)                 | 0.064                                | -2.32 to 2.45          | 1.11         |
| 9-24 months (cm) | All                 | 3211             | 80.15 (5.75)                 | -0.013                               | -2.78 to 2.76          | 1.12         |
|                  | White British boys  | 665              | 80.83 (5.48)                 | -0.007                               | -2.63 to 2.62          | 1.06         |
|                  | Pakistani boys      | 879              | 81.05 (5.79)                 | -0.008                               | -2.84 to 2.82          | 1.09         |
|                  | White British girls | 721              | 78.77 (5.70)                 | -0.019                               | -2.59 to 2.56          | 1.10         |
|                  | Pakistani girls     | 946              | 79.87 (5.73)                 | -0.016                               | -2.99 to 2.95          | 1.20         |

\*The residual SD is the SD of the level 1 residuals, i.e. measurement error, so greater residual SD represents worse model fit. The overall residual SD is 0.13 for weight and 1.15 for length.

**Table S3:** Predicted weight (kg) and length (cm) and 95% CIs for each ethnicity and sex group at each of the knot points (unadjusted model)

| Age                | Mean predicted weight/length (95%CI) |                      |                      |                      |
|--------------------|--------------------------------------|----------------------|----------------------|----------------------|
|                    | White British boys                   | Pakistani boys       | White British girls  | Pakistani girls      |
| <b>Weight (kg)</b> |                                      |                      |                      |                      |
| Birth              | 3.30 (3.24, 3.37)                    | 3.10 (3.04, 3.15)    | 3.16 (3.10, 3.22)    | 2.98 (2.93, 3.03)    |
| 4 months           | 7.21 (7.10, 7.32)                    | 7.00 (6.90, 7.10)    | 6.48 (6.37, 6.58)    | 6.27 (6.17, 6.36)    |
| 9 months           | 9.31 (9.18, 9.43)                    | 9.03 (8.92, 9.14)    | 8.69 (8.57, 8.81)    | 8.40 (8.29, 8.51)    |
| 24 months          | 12.63 (12.44, 12.82)                 | 12.57 (12.40, 12.74) | 11.93 (11.75, 12.11) | 12.05 (11.89, 12.21) |
| <b>Length (cm)</b> |                                      |                      |                      |                      |
| Birth              | 48.85 (48.44, 49.26)                 | 48.34 (48.00, 48.68) | 48.35 (48.02, 48.67) | 47.89 (47.58, 48.17) |
| 4 months           | 64.41 (63.86, 64.97)                 | 65.15 (64.61, 65.69) | 62.52 (61.99, 63.05) | 63.64 (63.12, 64.16) |
| 9 months           | 72.48 (72.11, 72.85)                 | 72.85 (72.52, 73.18) | 70.67 (70.31, 71.03) | 71.55 (71.23, 71.88) |
| 24 months          | 86.41 (85.96, 86.87)                 | 87.03 (86.62, 87.44) | 84.75 (84.31, 85.20) | 85.81 (85.41, 86.20) |

Below is an example of the equation used to model the association between ethnicity (Pakistani versus White British) with weight growth in infants. Equivalent models were run for length, with and without adjustment for confounders

$$\begin{aligned} \text{weight}_{ij} = & (\beta_0 + u_{0j} + e_{0ij}) + (\beta_1 + u_{1j})(G1_{ij}) + (\beta_2 + u_{2j})(G2_{ij}) + (\beta_3 + u_{3j})(G3_{ij}) + (\beta_4 + e_{1ij})(\text{WhiteBritishFemales}_j) \\ & + \beta_5(\text{WhiteBritishFemales}_j * G1_{ij}) + \beta_6(\text{WhiteBritishFemales}_j * G2_{ij}) + \beta_7(\text{WhiteBritishFemales}_j * G3_{ij}) + \\ & (\beta_8 + e_{3ij})(\text{PakistaniMales}_j) + \beta_9(\text{PakistaniMales}_j * G1_{ij}) + \beta_{10}(\text{PakistaniMales}_j * G2_{ij}) + \\ & \beta_{11}(\text{PakistaniMales}_j * G3_{ij}) + (\beta_{12} + e_{2ij})(\text{PakistaniFemales}_j) + \beta_{13}(\text{PakistaniFemales}_j * G1_{ij}) + \\ & \beta_{14}(\text{PakistaniFemales}_j * G2_{ij}) + \beta_{16}(\text{PakistaniFemales}_j * G3_{ij}) + (\beta_{16} + e_{4ij})(\text{Source}_{ij}) + \beta_{17}(C_j) + \\ & \beta_{18}(C * G1_{ij}) + \beta_{19}(C * G2_{ij}) + \beta_{20}(C * G3_{ij}) + e_{5ij}(\text{agewk}_{ij}) \end{aligned}$$

Where, for individual j at measurement occasion i:

$\beta_0$ =average estimate of birth weight in kilograms in male White British children

$\beta_1$  to  $\beta_3$ =average estimates of weight growth rates for the four periods of growth in kilograms per month in male White British children (G1=birth to 4 months, G2=4 to 9 months, G3=9 to 24 months)

$\beta_4$ =average difference in birth weight comparing female White British children with male White British children (WhiteBritishFemales is a dummy variable, coded 1 for female White British children, and 0 for all others)

$\beta_5$  to  $\beta_7$ =average difference in growth rates comparing female White British children with male White British children

$\beta_8$  to  $\beta_{11}$ =average differences in birth weight and growth rates comparing male Pakistani children with male White British children (PakistaniMales is a dummy variable, coded 1 for male Pakistani children, and 0 for all others)

$\beta_{12}$  to  $\beta_{15}$ =average differences in birth weight and growth rates comparing female Pakistani children with male White British children (PakistaniFemales is a dummy variable, coded 1 for female Pakistani children, and 0 for all others)

$\beta_{16}$  is measurement source (coded 1 for health visitor measurements, 0 for research clinic measurements)

$\beta_{17}$  is the association between C, representing a set of confounders, and birth weight

$\beta_{18}$  –  $\beta_{20}$  is the association between C, representing a set of confounders, and growth rates

u=individual level random effects

e=occasion level random effects

agewk=age in weeks, which is fitted as a random-effect at the occasion level (i) in order to allow for the variance of weight to change with age
